# Supplementary material
Source: publisher figshare collection journal article supplement (https://gsajournals.figshare.com/ndownloader/files/15511979)
Supplement: Supplementary file 1 [file 15511979]

**Supporting Table 3: Statistical analysis of biomarker data**

Linear model examining main effects (sex, treatment;Trt and time) and two additional treatment interactions (with sex and time). All values are given as estimates (standard error).
